# Supplementary material for: Distributed Hydrological Model Based on Machine Learning Algorithm: Assessment of Climate Change Impact on Floods
Source: MDPI journal article supplement (doi:10.3390/su14116620), 2022-05-28
Supplement: s1 [file s1]

Archive with 1 entries (1 files):
- sustainability-1697725-supplementary.pdf
