# Supplementary material for: Distributed Hydrological Model Based on Machine Learning Algorithm: Assessment of Climate Change Impact on Floods
Source: MDPI journal article supplement (doi:10.3390/su14116620), 2022-05-28
Supplement: s1 [file s1 › sustainability-1697725-supplementary.pdf]

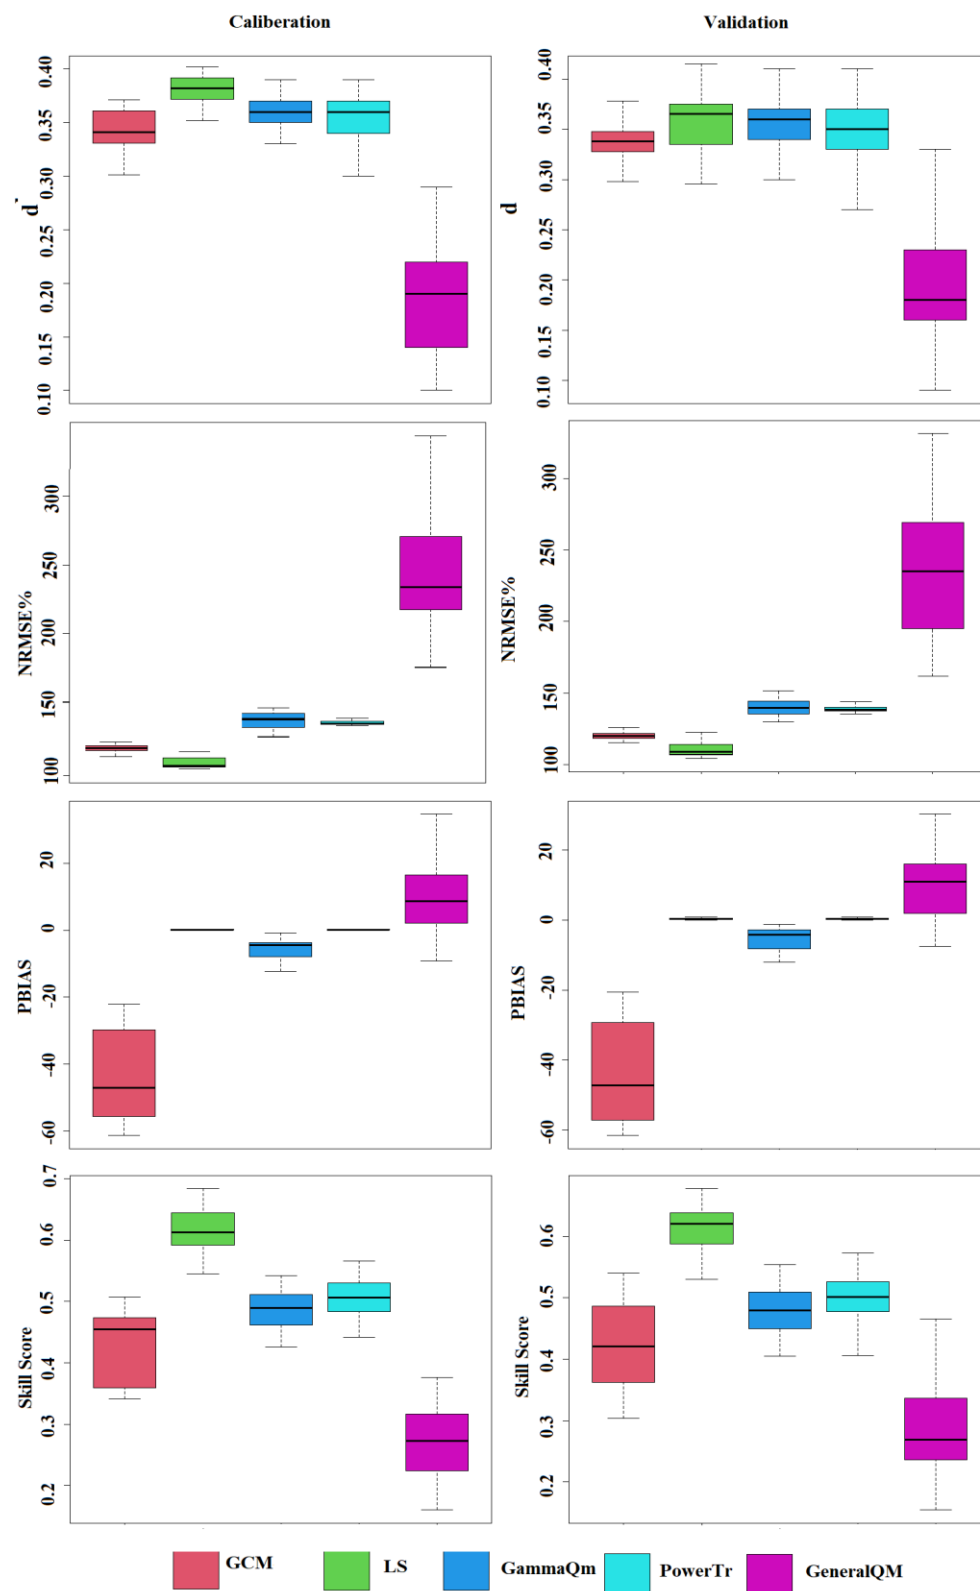

Figure S1. The statistical performance of the downscaled and raw EC-Earth-Veg GCMs for precipitation

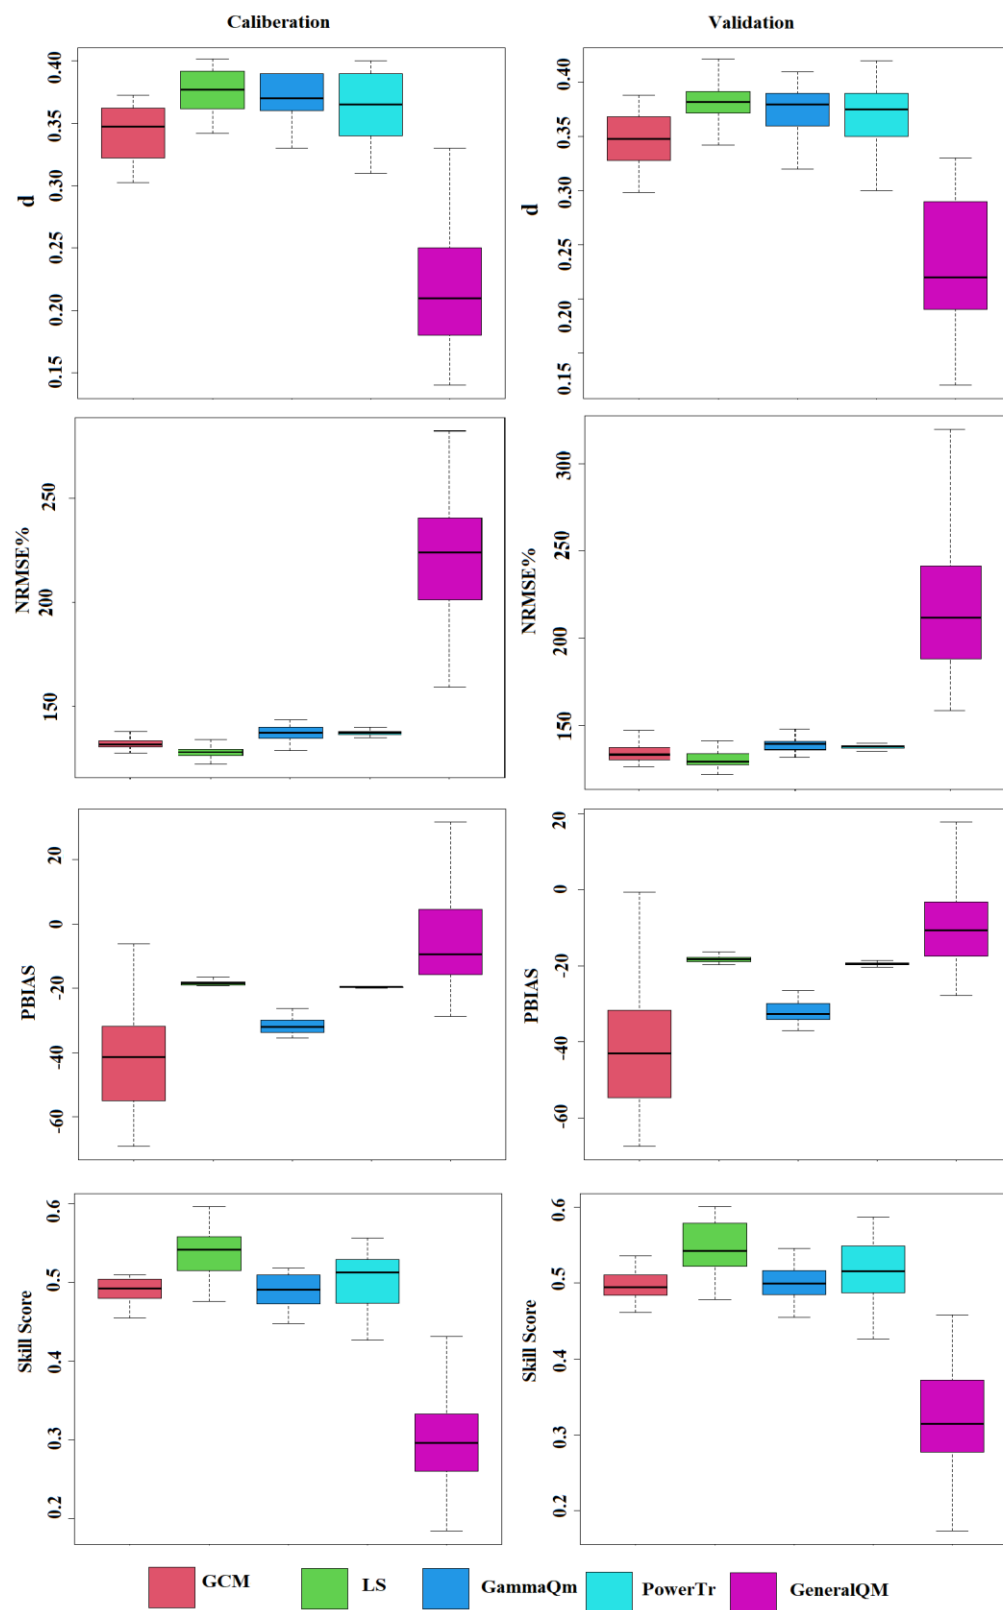

Figure S2. The statistical performance of the downscaled and raw MRI-ESM2 GCMs for precipitation

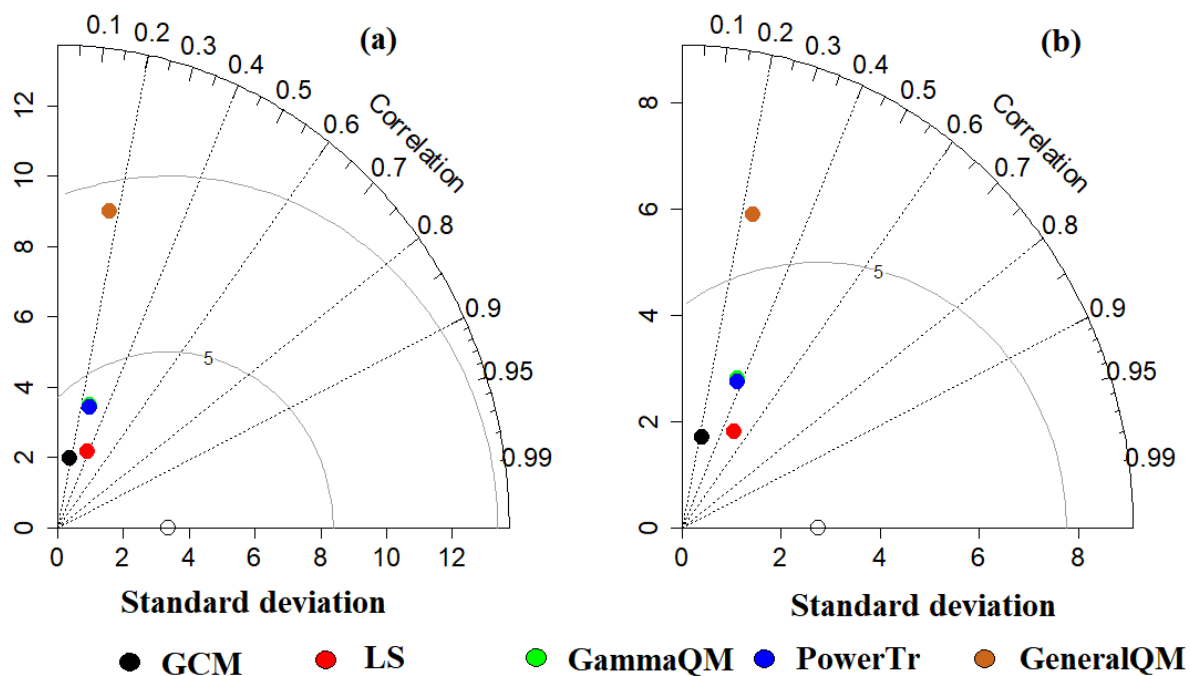

Figure S3. Taylor diagram shows bias correction methods' performance to correct EC-Earth-Veg during (a) cali-bration; (b) validation periods.

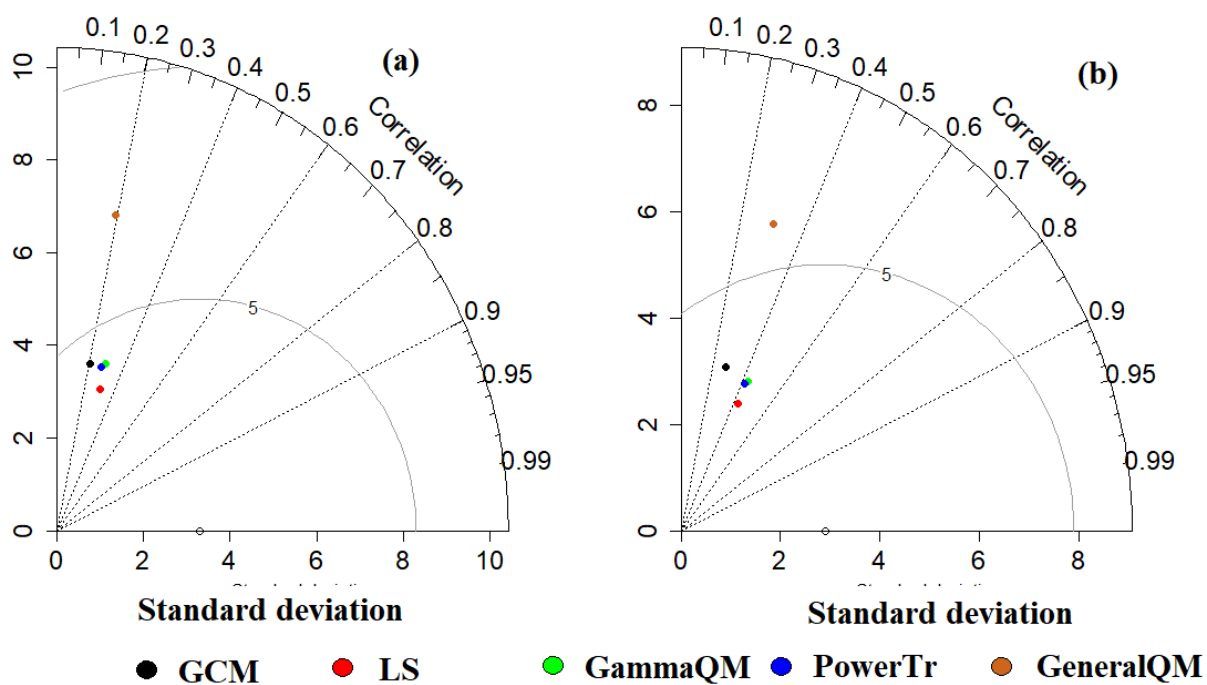

Figure S4. Taylor diagram shows bias correction methods' performance to correct MRI-ESM2 during (a) calibration; (b) validation periods.

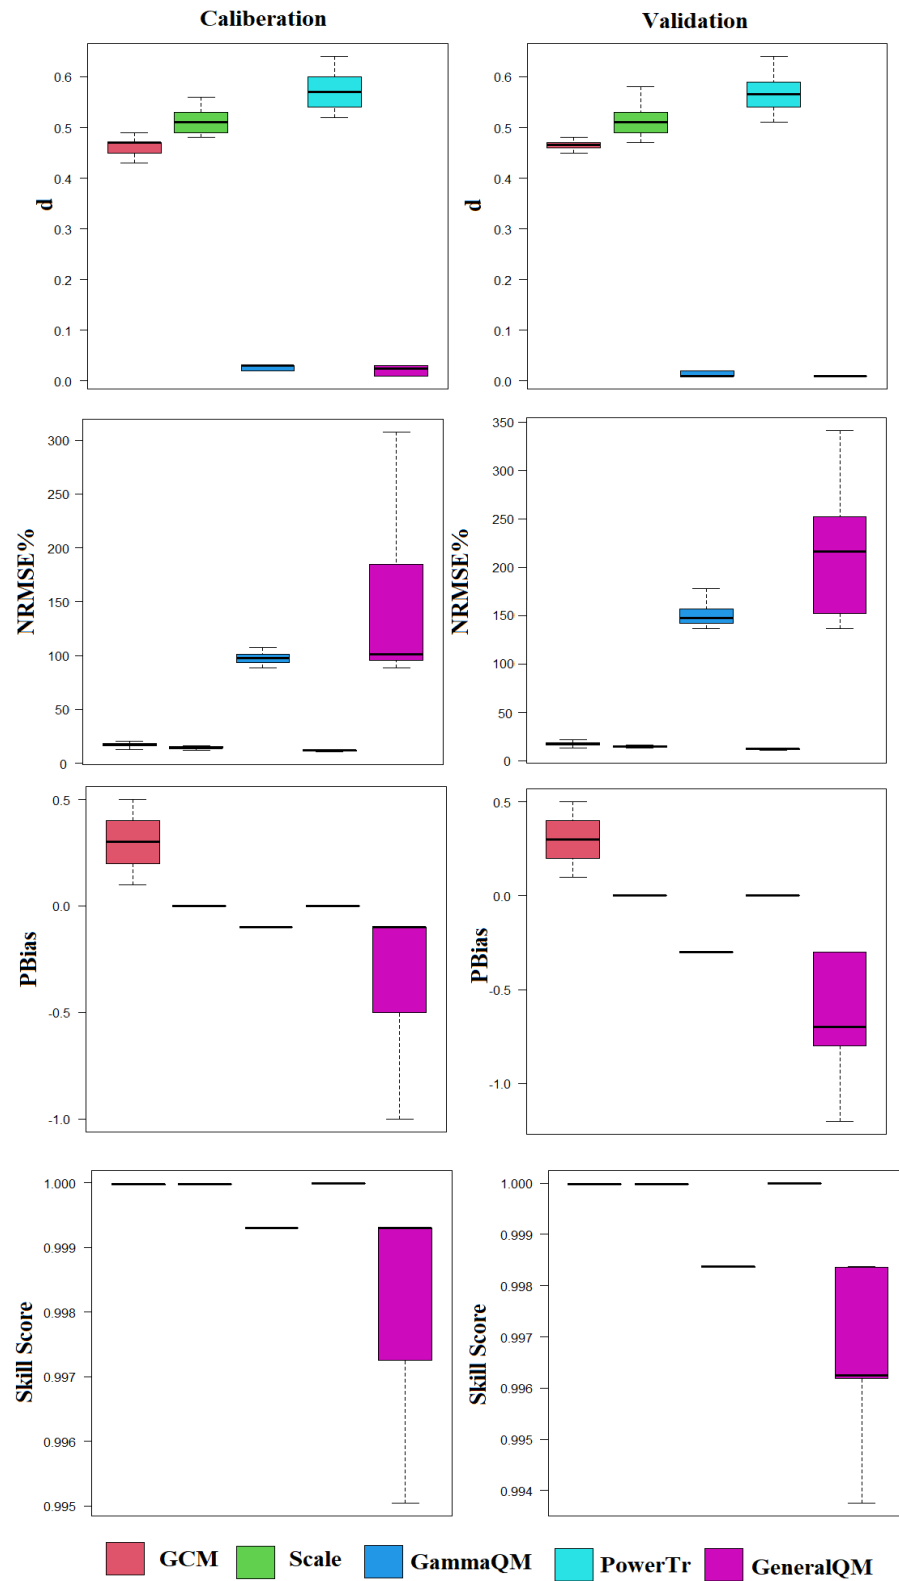

Figure S5. The statistical performance of the downscaled and raw EC-Earth-Veg GCMs for maximum temperature.

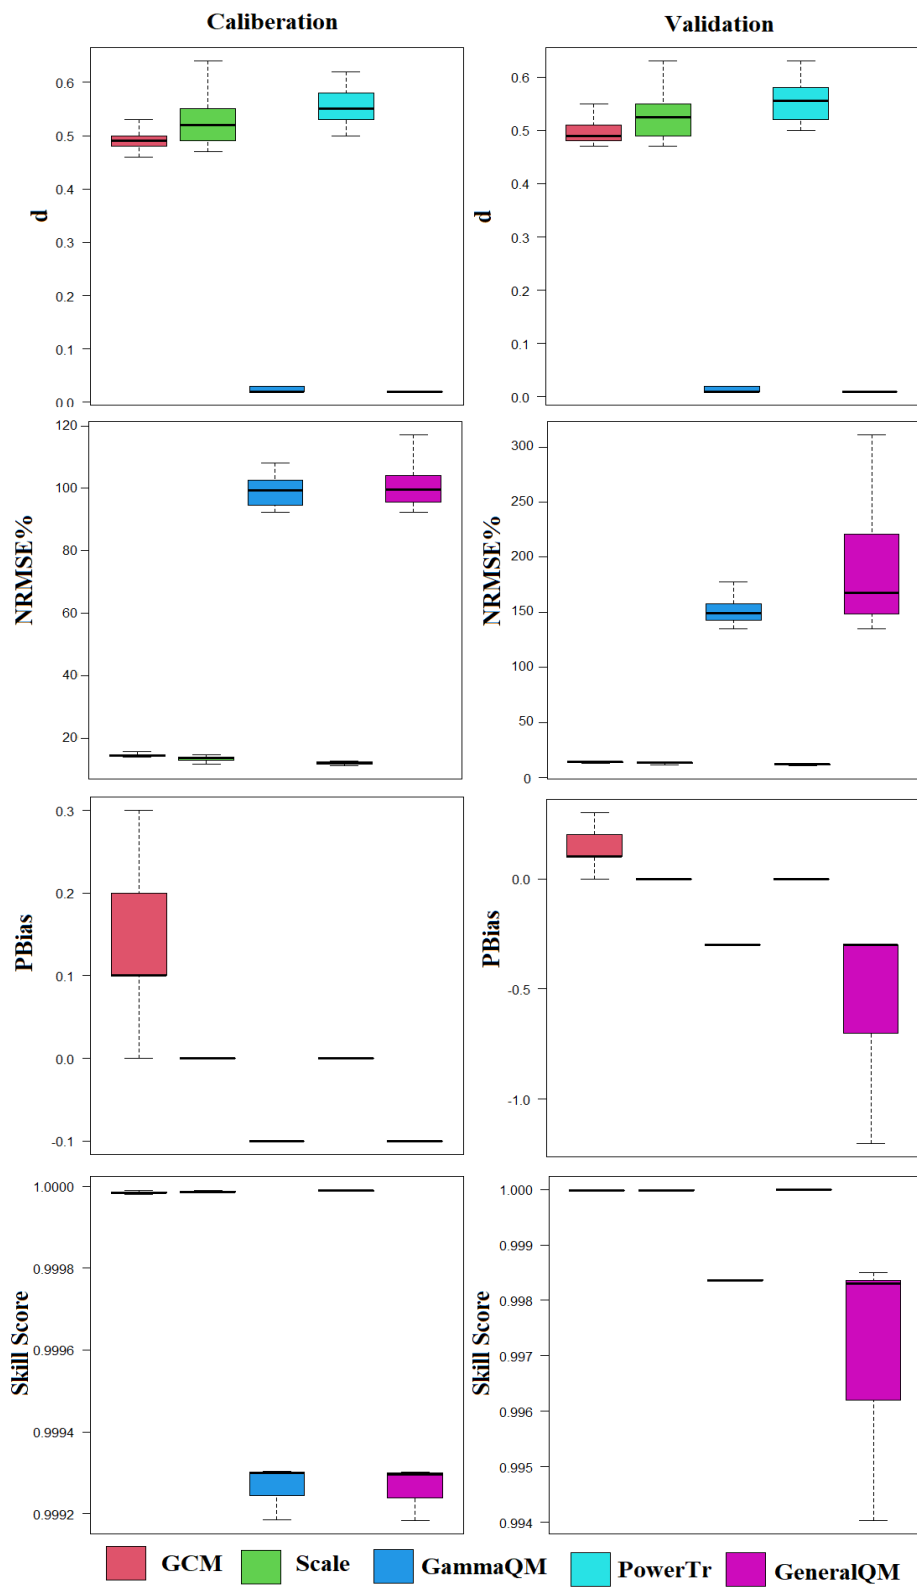

Figure S6. The statistical performance of the downscaled and raw MRI-ESM2 GCMs for maximum temperature.

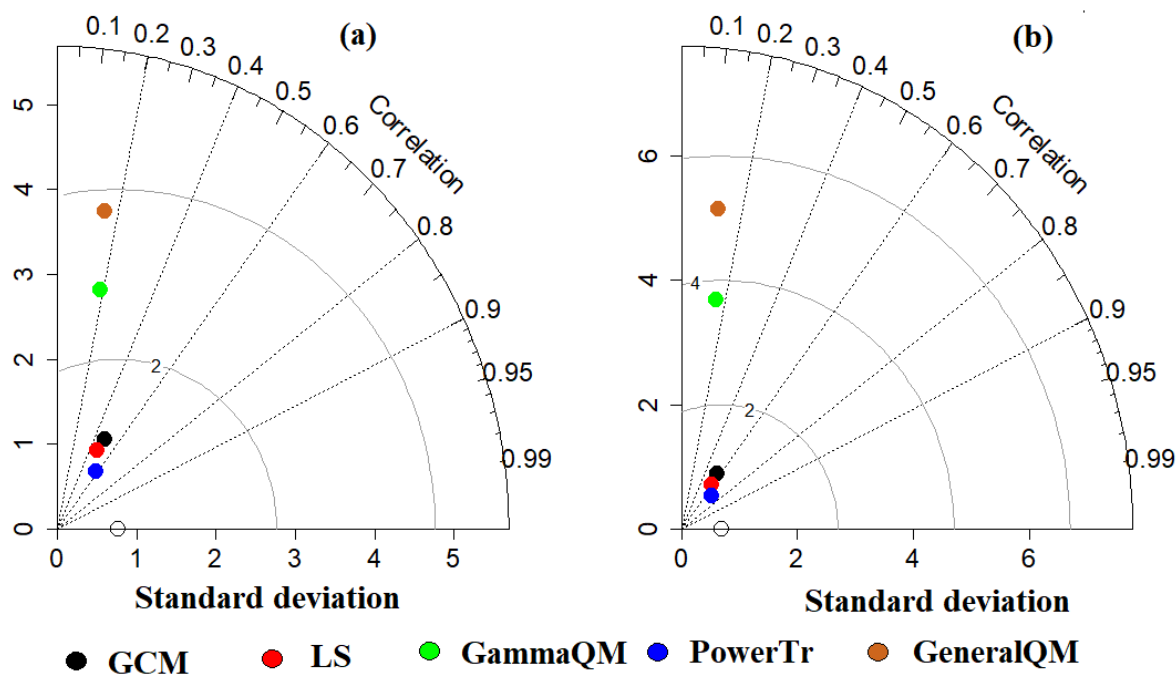

Figure S7. Taylor diagram shows bias correction methods' performance to correct EC-Earth-veg maximum temperature during (a) calibration; (b) validation periods.

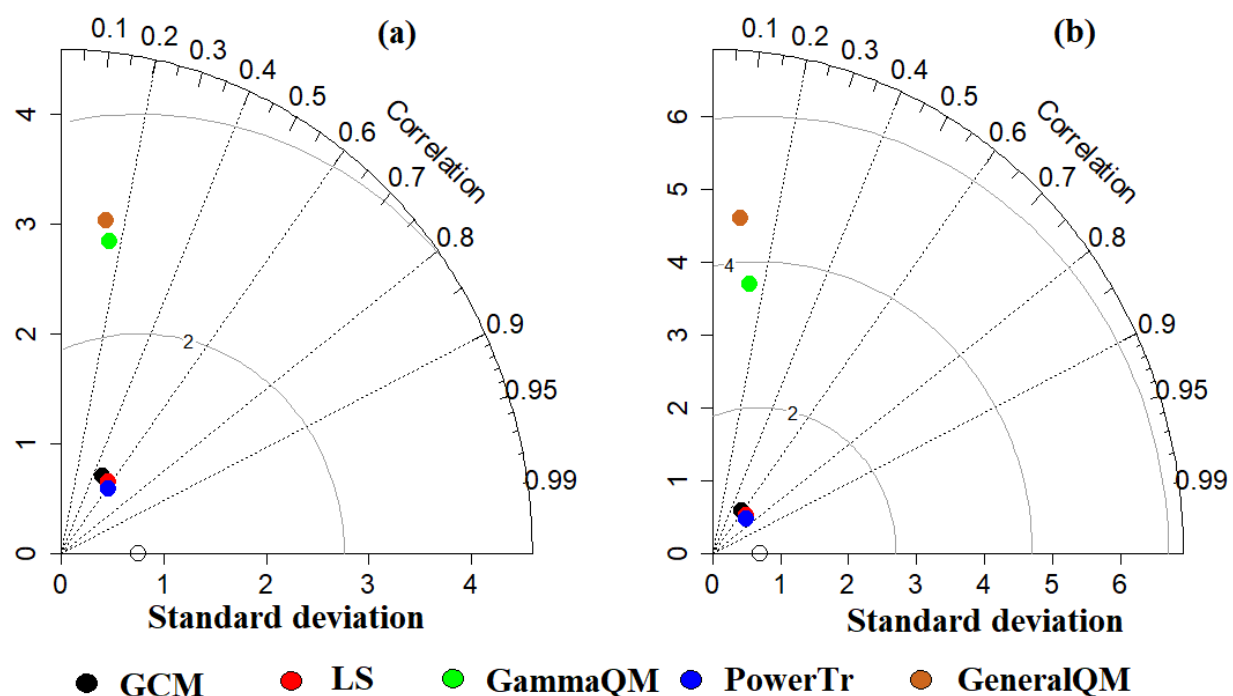

Figure S8. Taylor diagram shows bias correction methods' performance to correct MRI-ESM2 maximum temperature during (a) calibration; (b) validation periods

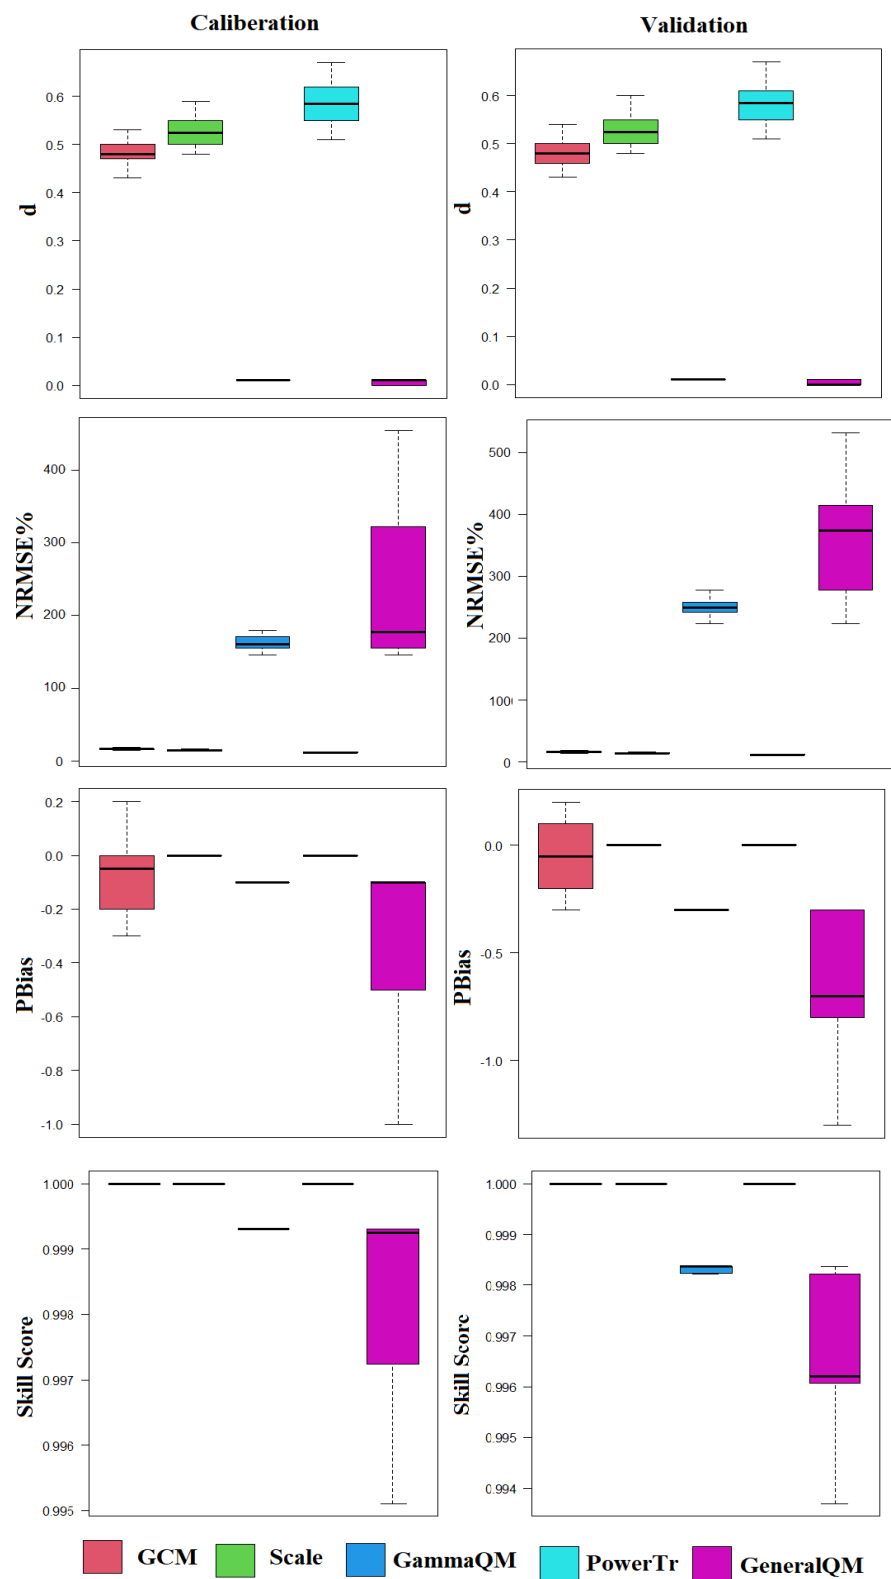

Figure S9. The statistical performance of the downscaled and raw EC-Earth-Veg GCMs for minimum temperature.

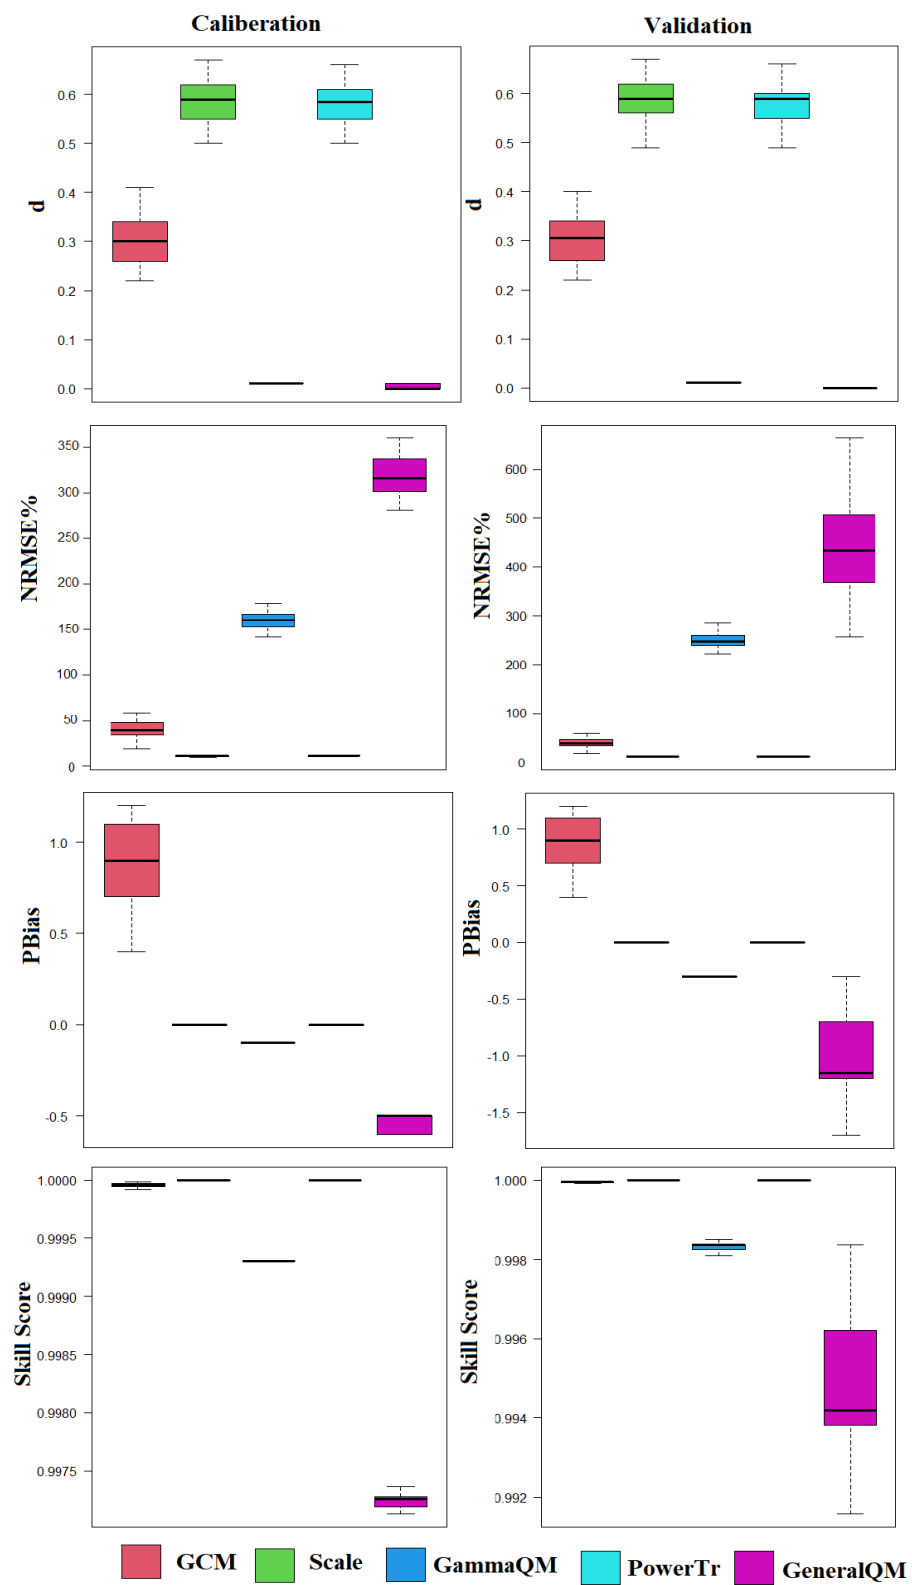

Figure S10. The statistical performance of the downscaled and raw MRI-ESM2 GCMs for minimum temperature.

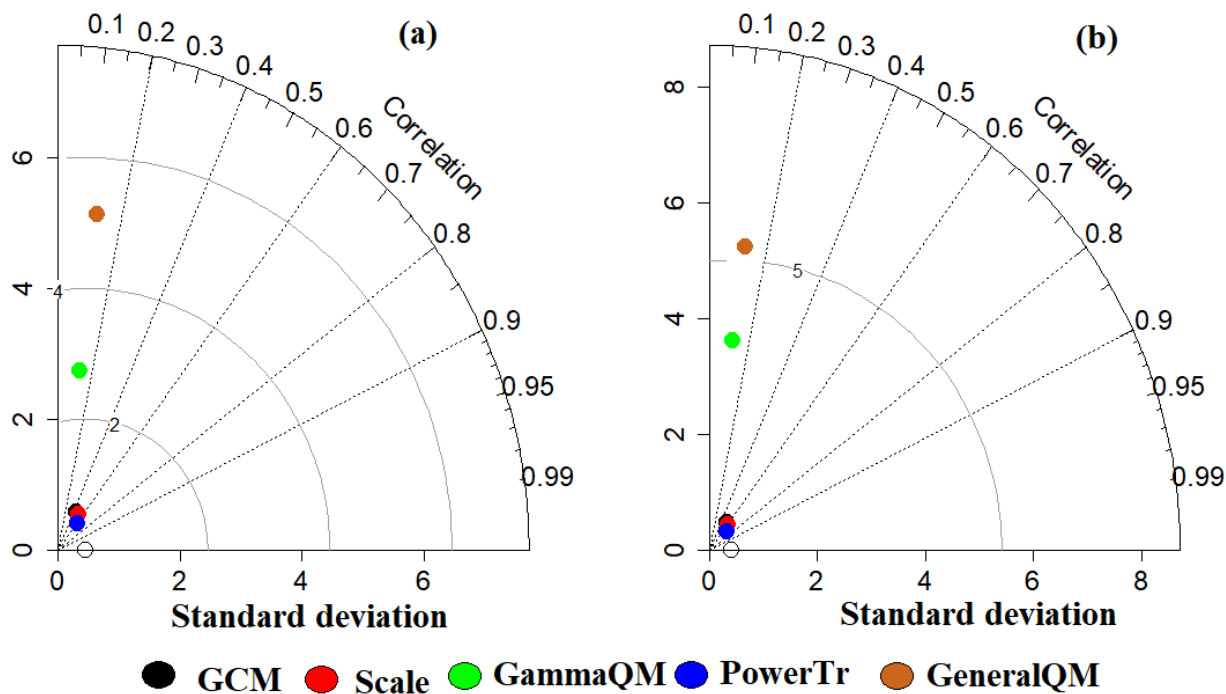

Figure S11. Taylor diagram shows bias correction methods' performance to correct EC-Earth-veg minimum temperature during (a) calibration; (b) validation periods

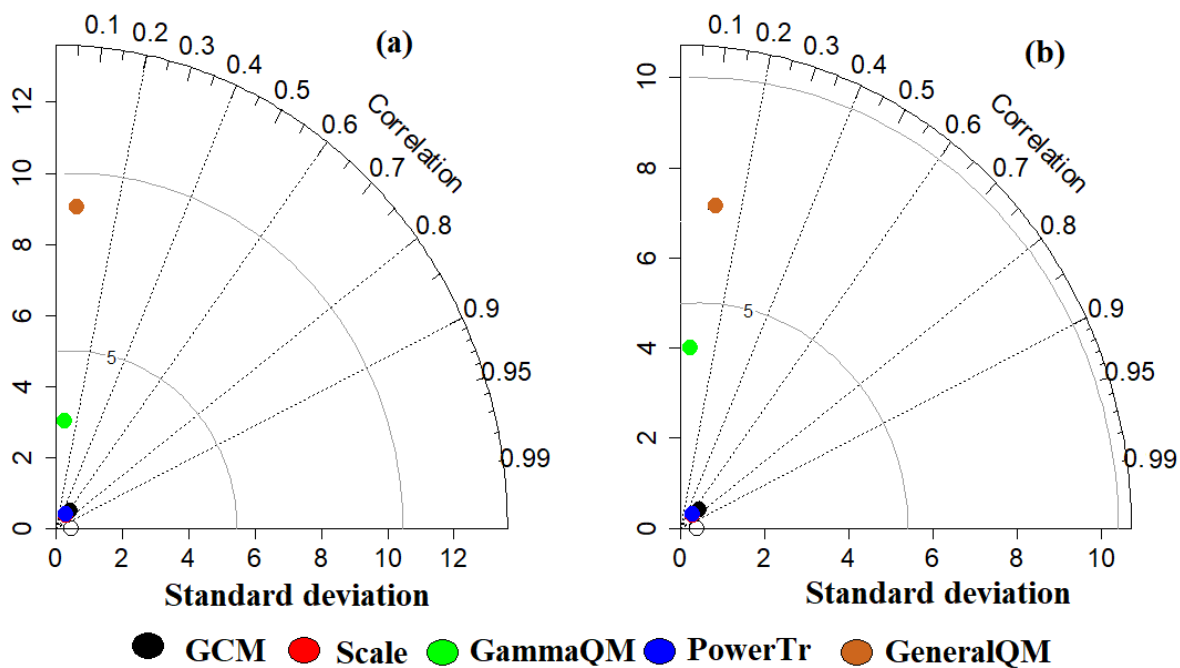

Figure S12. Taylor diagram shows bias correction methods' performance to correct MRI-ESM2 minimum temperature during (a) calibration; (b) validation periods
